## CORRECTION

# Correction: Zebrafish *dazl* regulates cystogenesis and germline stem cell specification during the primordial germ cell to germline stem cell transition

Sylvain Bertho, Mara Clapp, Torsten U. Banisch, Jan Bandemer, Erez Raz and Florence L. Marlow

There were errors in *Development* (2021) **148**, dev187773 (doi:10.1242/dev.187773).

The *dazl*<sup>ae34</sup> allele was incorrect in Fig. 2B.

The corrected and original panels are shown below.

**B**

```

WT      GACGCCCAACACACTGTCGTCGGCGGTATTGATATGA
dazlΔ7 GACGCCCAACAC-----GTTGGCGGTATTGATATGA (-7)

WT      TGCAGCTGCTGTCTCCAGGCCTGGCCCCACCATCACCCGTATTCAGTGGAGGAA
dazlae57 TGCAGCTGCTGTCTCCA-----CCTGTCCTGCCTGGCCCCACCATCACCTGTATTTAG (-2, +9, 2s)
dazlae34 TGCAGCTGCTGTCTCCACCATCACCCGTATTC-----AGTGGAGGAA (+15, -12)
  
```

**Fig. 2B (corrected panel). *dazl* mutagenesis and fertility phenotypes.** (B) *dazl* alleles generated by ZFN (*dazl*<sup>Δ7</sup>) and CRISPR (*dazl*<sup>ae57</sup> and *dazl*<sup>ae34</sup>). Partial ZFNs and Cas9 binding sites are highlighted in red. Dashed lines represent deletions and orange denotes substitutions.

**B**

```

WT      GACGCCCAACACACTGTCGTCGGCGGTATTGATATGA
dazlΔ7 GACGCCCAACAC-----GTTGGCGGTATTGATATGA (-7)

WT      TGCAGCTGCTGTCTCCAGGCCTGGCCCCACCATCACCCGTATTCAGTGGAGGAA
dazlae57 TGCAGCTGCTGTCTCCA-----CCTGTCCTGCCTGGCCCCACCATCACCTGTATTTAG (-2, +9, 2s)
dazlae34 TGCAGCTGCTGTCTCCA-----CCATCACCCGTATTCAGTGGAGGAA (-12, +15)
  
```

**Fig. 2B (original panel). *dazl* mutagenesis and fertility phenotypes.** (B) *dazl* alleles generated by ZFN (*dazl*<sup>Δ7</sup>) and CRISPR (*dazl*<sup>ae57</sup> and *dazl*<sup>ae34</sup>). Partial ZFNs and Cas9 binding sites are highlighted in red. Dashed lines represent deletions and orange denotes substitutions.

On p. 3, the length of the amino acid deletion in the *dazl*<sup>ae34</sup> was incorrect.

In Fig. S4, the *dazl*<sup>ae34</sup> allele was incorrect.

The authors apologise to readers for these errors, which do not impact the results or conclusions of this article. Both the online full-text and PDF versions of the article have been corrected.
